# Supplementary material for: The Impact of Reconstruction Methods, Phylogenetic Uncertainty and Branch Lengths on Inference of Chromosome Number Evolution in American Daisies (Melampodium, Asteraceae)
Source: PLOS journal article supplement (doi:10.1371/journal.pone.0162299), 2016-09-09
Supplement: S1 (10.1371/journal.pone.0162299.s001) [file journal.pone.0162299.s001]

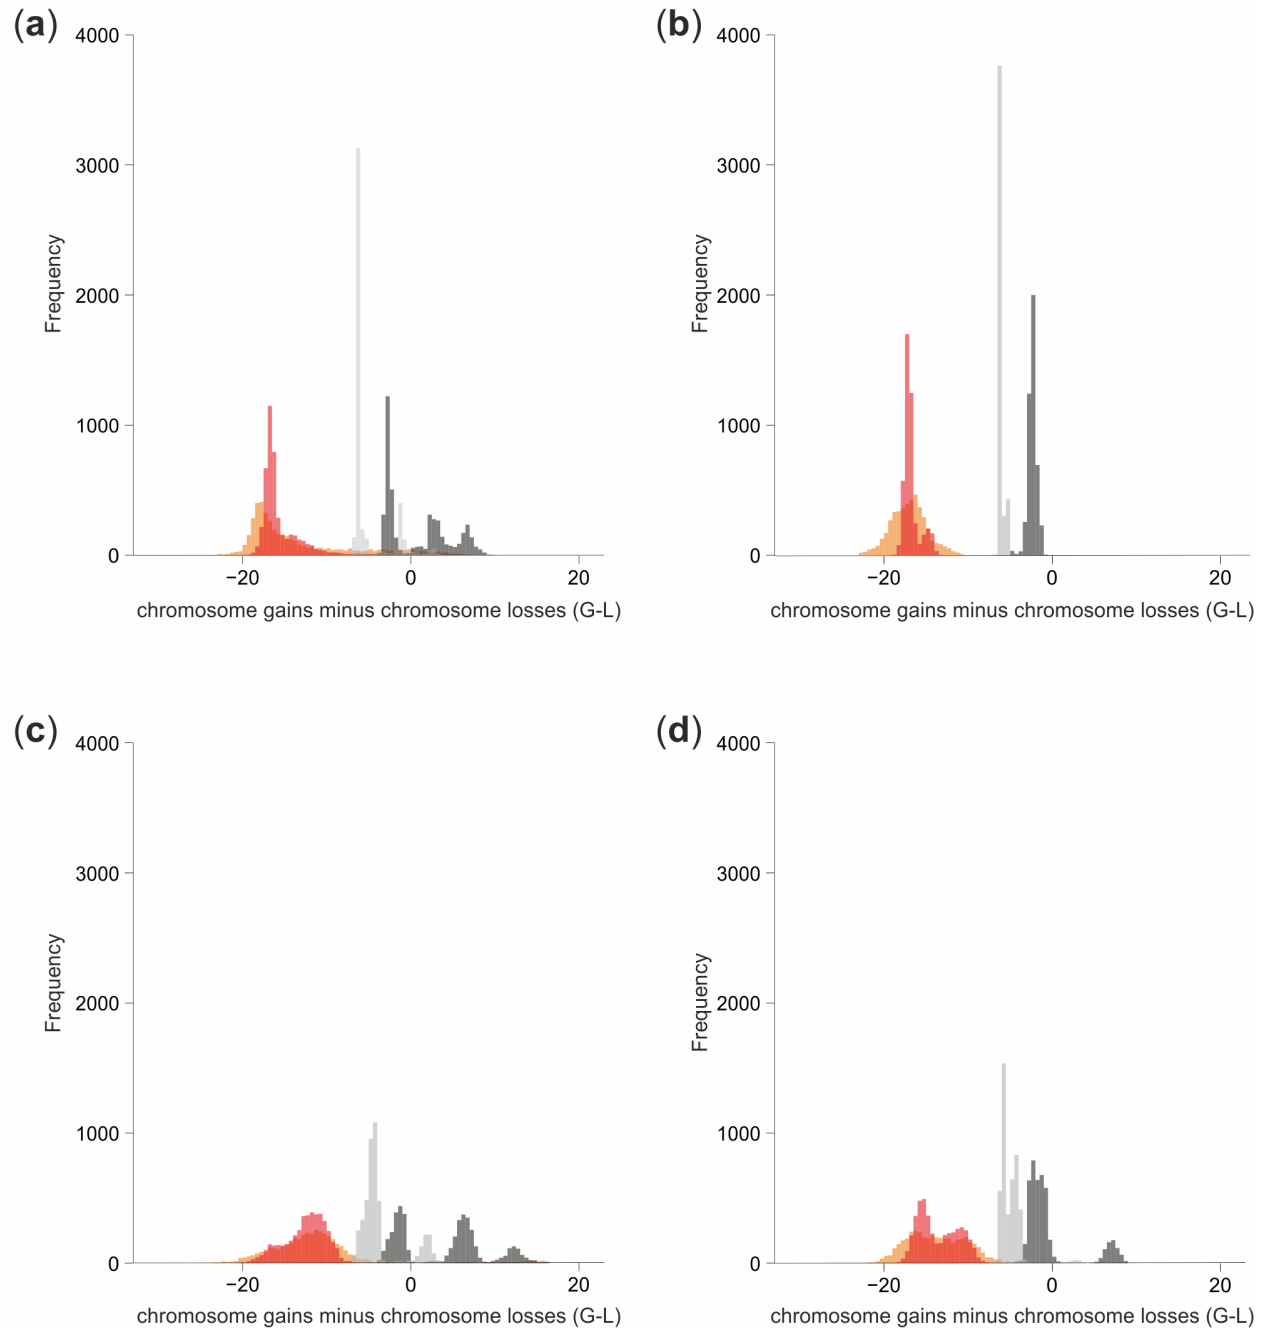

**S1 Fig**

**Distributions of the number of chromosome gains minus the number of chromosome losses (G-L) with and without *Melampodium repens*.** G-L distributions reconstructed using maximum likelihood in CHROMEVOLE (ML-CE, grey) and in BAYESTRAITS (ML-BT, shades of red) on phylogenetic trees obtained from analyses of (a) nuclear sequence data using BEAST (ITS-B), (b) nuclear sequence data using MRBAYES (ITS-MB), (c) plastid sequence data using BEAST (matK-B) and (d) plastid sequence data using MRBAYES (matK-MB) before (dark grey and orange) and after (light grey and red) pruning *Melampodium repens*, the sole species with  $n = 14$ , and restricting minimum and maximum chromosome number to 9 and 12, respectively.
